# Supplementary material for: Striatal Neurodevelopment Is Dysregulated in Purine Metabolism Deficiency and Impacts DARPP-32, BDNF/TrkB Expression and Signaling: New Insights on the Molecular and Cellular Basis of Lesch-Nyhan Syndrome
Source: PubMed Central journal article supplement (PMC4013014; doi:10.1371/journal.pone.0096575), 2014-05-07
Supplement: pone.0096575.s001.pdf [file pone.0096575.s001.pdf]

**Table 1s: List of Primers**

| <b>PRIMERS</b> | <b>SEQUENCES</b>       | <b>AMPLICON SIZE</b> |
|----------------|------------------------|----------------------|
| m-HPRT-F       | TGTTGTTGGATATGCCCTTGAC |                      |
| m-HPRT-R       | GGCCACAGGACTAGAACACC   | 180                  |
| m-ASCL1-F      | TGACTTTTGCGGCTGCTTTC   |                      |
| m-ASCL1-R      | GCAGAAGGAGGCAGAGTTGT   | 200                  |
| m-FOXG1-F      | ACTGTTTGGGTCTGTGCTCG   |                      |
| m-FOXG1-R      | GTAGCAAAGAGCTTCCTGCG   | 163                  |
| m-DLX2-F       | ACCCAGCGGTATTGGAAGTG   |                      |
| m-DLX2-R       | CCAGGCTTGGCACTAAAGGA   | 117                  |
| m-GSX1-F       | GACATGTCGCGCTCCTTCTA   |                      |
| m-GSX1-R       | ATGAAGAAATCCGGCCCTGG   | 101                  |
| m-actinin2-F   | CCCAGCGCCATGAATCAGATA  |                      |
| m-actinin2-R   | ATGTTCTCGATCTGGGTGCC   | 194                  |
| m-RGS9-1-F     | CGTGTATACAGGGACCTGCG   |                      |
| m-RGS9-1-R     | AGAACCCTCCAAAGCCACTC   | 157                  |
| m-ARPP19-F     | GTCTTGCCTCCCGGTAATCT   |                      |
| m-ARPP19-R     | ATCAGACCCTCCAGGCTTTTG  | 197                  |
| m-NGEF-F       | TGCTTATGTGGGGGACACAC   |                      |
| m-NGEF-R       | GCCAGAAGTTCCTGGGTGTT   | 113                  |
| m-BCL11b-F     | CACCCACGAAAGGCATCTGT   |                      |
| m-BCL11b-R     | GCACGCAGAGGTGAAGTAATC  | 136                  |
| m-FOXP1-F      | TTTCCGAGGGAACCCTTTTCG  |                      |
| m-FOXP1-R      | GGAGCCCTTTAGGCTAGCAG   | 105                  |
| m-PDE10A-F     | ATACCACCCGGGATGAAGGA   |                      |
| m-PDE10A-R     | AAGAACAGACTGGATGCGGG   | 186                  |
| m-PPP1R1B-F    | CGACAGGTGGAGATGATCCG   |                      |
| m-PPP1R1B-R    | CACAGGGGTTGGGTCTCTTC   | 156                  |
| h-PPP1R1B-F1   | ACTTCTCACAAGGACTGGGTG  |                      |
| h-PPP1R1B-R1   | TCTGGTGAGGAGTGCTCTGA   | 182                  |
| m-BDNF-F       | GGGAAATCTCCTGAGCCGAG   |                      |
| m-BDNF-R       | AGCTTTCTCAACGCCTGTCA   | 171                  |
| h-GAPDH-F      | GACAGTCAGCCGCATCTTCT   |                      |
| h-GAPDH-R      | GCGCCAATACGACCAAATC    | 104                  |
| m-GAPDH-F      | CTCCCACTCTCCACCTTCG    |                      |
| m-GAPDH-R      | TAGGGCCTCTCTTGCTCAGT   | 193                  |
| m-TRKB-F1      | CCAAGTTTGGCATGAAAGGC   |                      |
| m-TRKB-R1      | TGCCAAAGTACTGGGGGTTT   | 101                  |
